# Supplementary material
Source: publisher site journal article supplement (https://www.dovepress.com/article/228290)
Supplement: Supplementary file 1 [file get_supplementary_file.php]

| Table S1. Association of daily sodium intake with dynapenia according to sex | | | | | | | | |
| --- | --- | --- | --- | --- | --- | --- | --- | --- |
|  | Crude | | Model 1 | | Model 2 | | Model 3 | |
|  | OR | (95% CI) | OR | (95% CI) | OR | (95% CI) | OR | (95% CI) |
| Men | |  |  |  |  |  |  |  |
| Sodium intake (mg/day) | |  |  |  |  |  |  |  |
| Q1 (-2152.53) | 2.79 | (1.86-4.18) | 1.88 | (1.26-2.80) | 1.40 | (0.87-2.25) | 1.16 | (0.69-1.95) |
| Q2 (2152.53-3217.42) | 1.31 | (0.87-1.97) | 1.12 | (0.74-1.70) | 0.93 | (0.56-1.53) | 0.93 | (0.56-1.56) |
| Q3 (3217.42-4700.53) | 1.68 | (1.13-2.50) | 1.47 | (0.99-2.18) | 1.33 | (0.82-2.16) | 1.27 | (0.79-2.03) |
| Q4 (4700.53-)a | 1 |  | 1 |  | 1 |  | 1 |  |
| Women |  |  |  |  |  |  |  |  |
| Sodium intake (mg/day) | |  |  |  |  |  |  |  |
| Q1 (-1420.52) | 2.04 | (1.63-2.54) | 1.67 | (1.29-2.15) | 1.45 | (1.06-2.00) | 0.99 | (0.70-1.40) |
| Q2 (1420.52-2305.01) | 1.06 | (0.81-1.39) | 1.00 | (0.77-1.30) | 0.94 | (0.72-1.24) | 0.79 | (0.60-1.04) |
| Q3 (2305.01-3412.79)a | 1 |  | 1 |  | 1 |  | 1 |  |
| Q4 (3412.79-) | 1.01 | (0.81-1.24) | 1.24 | (0.98-1.56) | 1.03 | (0.77-1.37) | 1.09 | (0.80-1.48) |
| Abbreviations: CI, confidence interval; OR, odds ratio  aAs these quartiles were showed the lowest prevalence of dynapenia, they were defined as the reference groups based on which the OR for dynapenia in each group was calculated.  Model 1: age, BMI | | | | | | | | |
| Model 2: age, BMI, smoking, alcohol, education, marital status | | | | | | |  |  |
| Model 3: age, BMI, smoking, alcohol, education, marital status, Charlson comorbidity index, > 3kg of weight loss within past 1 year, total energy intake, protein intake, potassium intake, resistance exercise, aerobic exercise  Table S2. The association of sodium to potassium ratio with dynapenia   |  | Crude | | Model1 | | Model2 | | Model3 | | | --- | --- | --- | --- | --- | --- | --- | --- | --- | |  | OR | (95% CI) | OR | (95% CI) | OR | (95% CI) | OR | (95% CI) | | Men | |  |  |  |  |  |  |  | | Sodium to potassium ratio | |  |  |  |  |  |  |  | | Q1 (-0.8452)a | 1 |  | 1 |  | 1 |  | 1 |  | | Q2 (0.8452-1.1723) | 1.12 | (0.78-1.62) | 0.96 | (0.68-1.36) | 1.47 | (0.93-2.32) | 1.47 | (0.92-2.34) | | Q3 (1.1723-1.6081) | 1.32 | (0.97-1.79) | 1.26 | (0.92-1.73) | 1.67 | (1.07-2.59) | 1.46 | (0.94-2.25) | | Q4 (1.6081-) | 0.85 | (0.62-1.15) | 0.74 | (0.53-1.03) | 0.99 | (0.64-1.52) | 1.00 | (0.63-1.59) | | Women |  |  |  |  |  |  |  |  | | Sodium to potassium ratio | |  |  |  |  |  |  |  | | Q1 (-0.7088) | 1.05 | (0.83-1.34) | 1.15 | (0.89-1.49) | 1.12 | (0.84-1.48) | 1.04 | (0.77-1.41) | | Q2 (0.7088-1.031)a | 1 |  | 1 |  | 1 |  | 1 |  | | Q3 (1.031-1.466) | 1.18 | (0.94-1.49) | 1.17 | (0.91-1.50) | 1.00 | (0.75-1.34) | 0.95 | (0.70-1.29) | | Q4 (1.466-) | 2.02 | (1.64-2.48) | 1.92 | (1.53-2.43) | 1.62 | (1.26-2.09) | 1.54 | (1.17-2.03) | | Abbreviations: CI, confidence interval; OR, odds ratio  *As these quartiles were showed the lowest prevalence of dynapenia , they were defined as the reference groups based on which the OR for dynapenia in each group was calculated.  Model1: age, BMI | | | | | | | | | | Model2: age, BMI, smoking, alcohol drinking, education, marital status | | | | | | |  |  | | Model3: age, BMI, smoking, alcohol drinking, education, marital status, Charlson comorbidity index, > 3kg of weight loss within past 1 year, total energy intake, protein intake, resistance exercise, aerobic exercise | | | | | | | | | | | | | | | | | |
